# Supplementary material
Source: PubMed Central journal article supplement (PMC4355216)

Figure S1

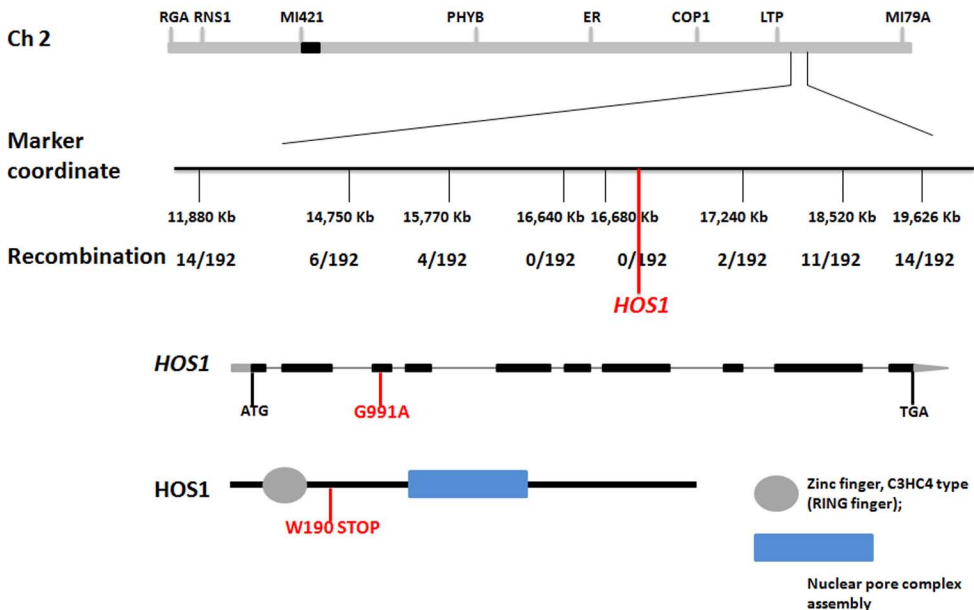

Figure S2

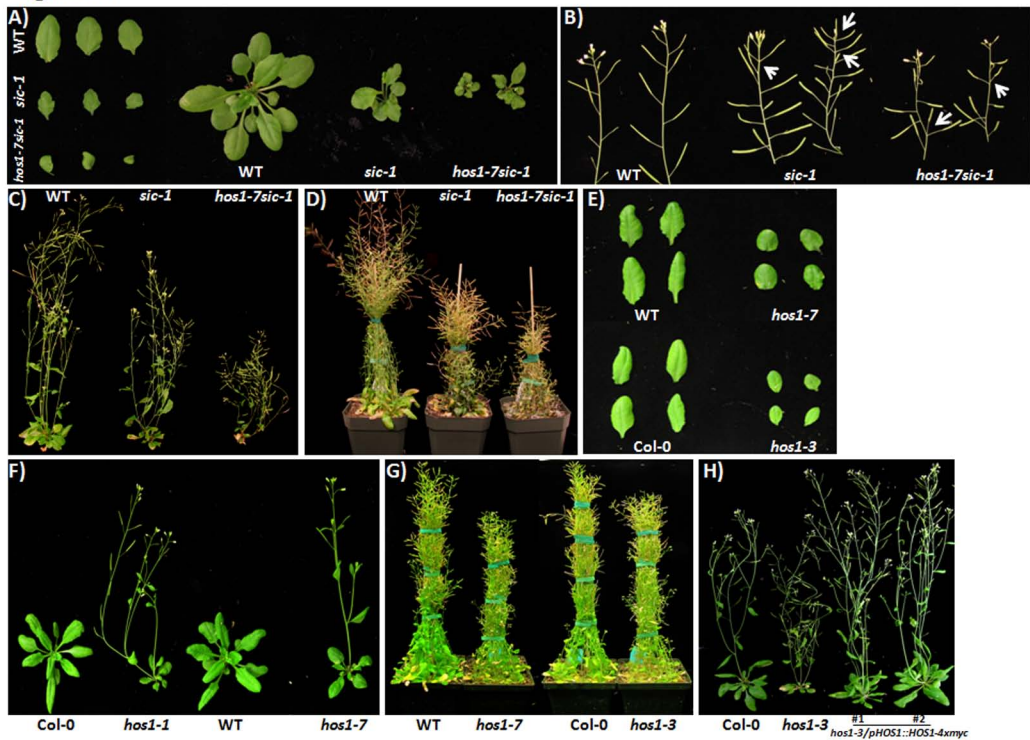

Figure S3

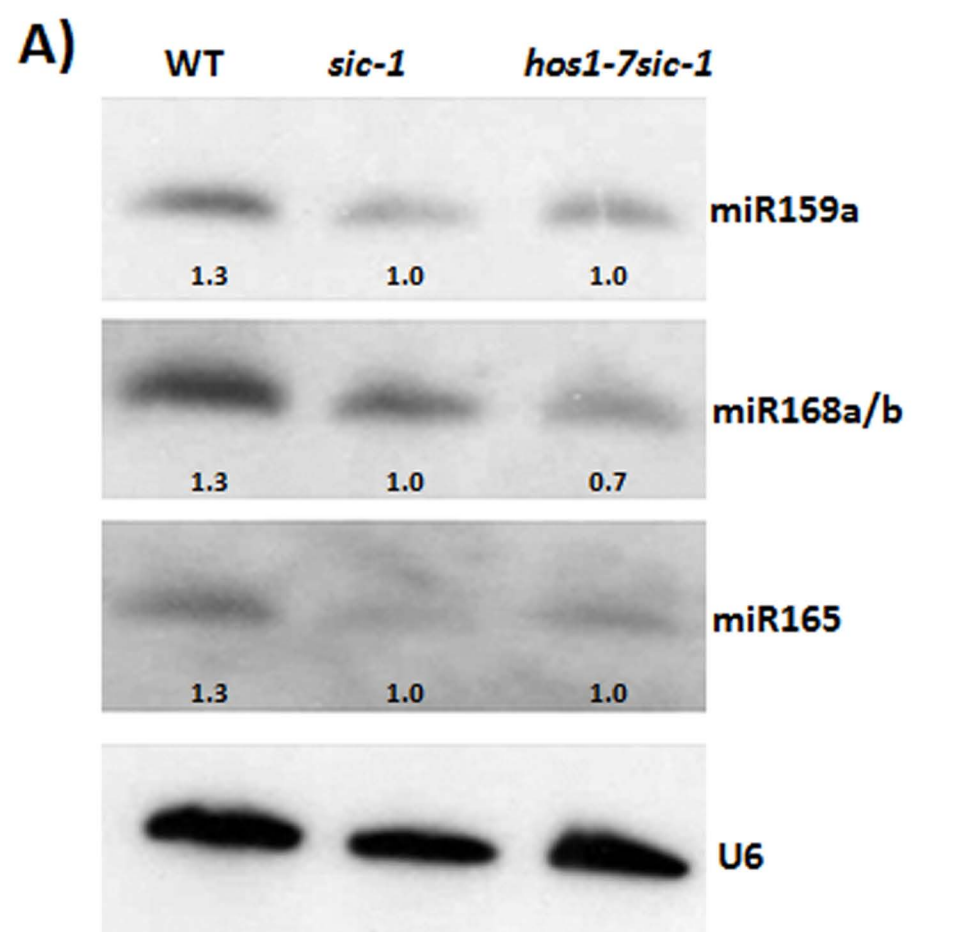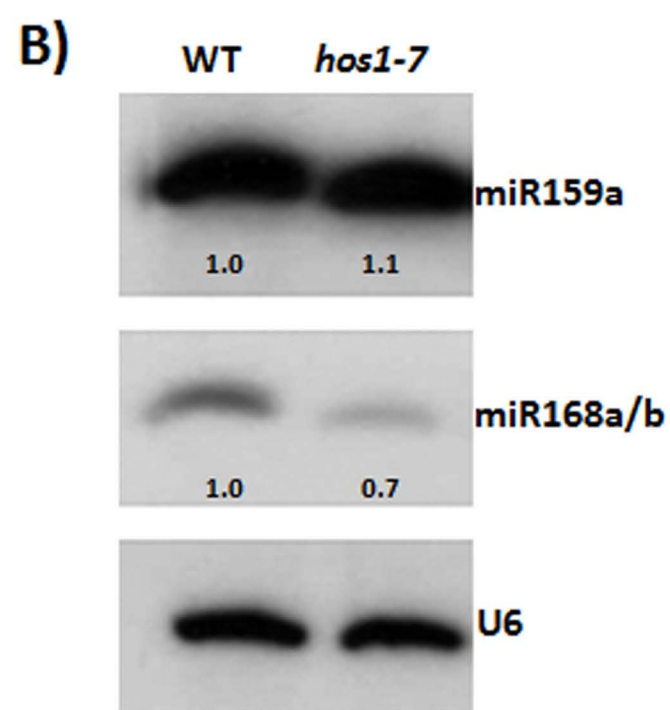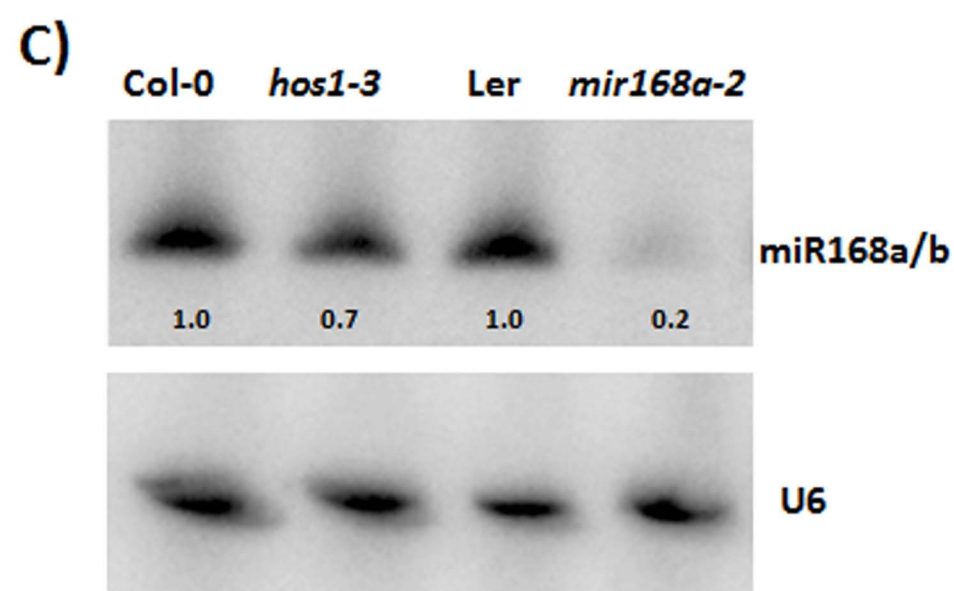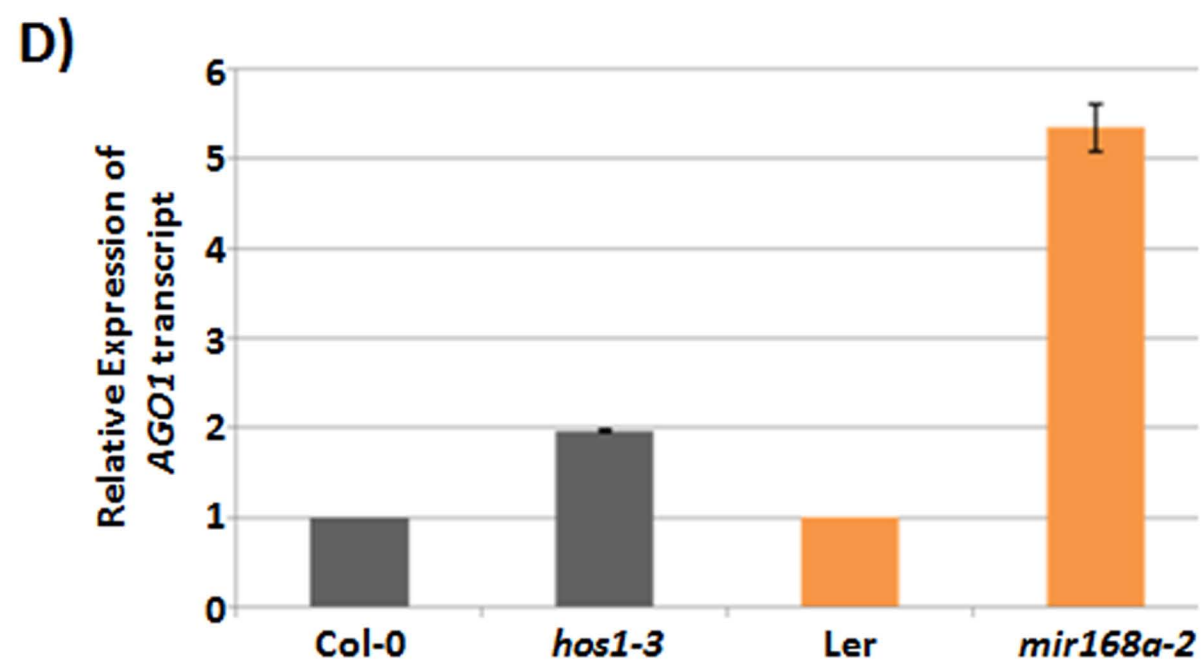

Figure S4

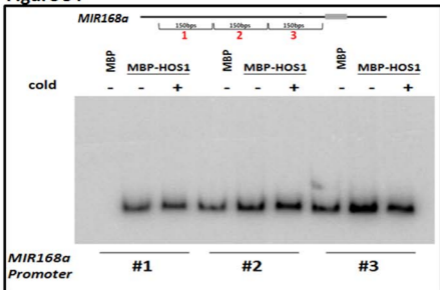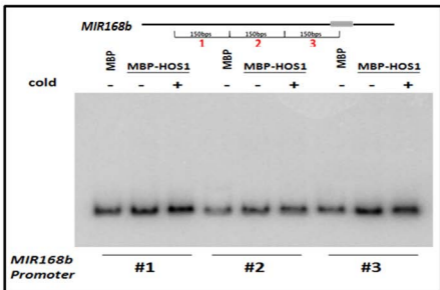

Supplement: NIHMS658875-supplement-Supp_FigureS1-S4.pdf [file NIHMS658875-supplement-Supp_FigureS1-S4.pdf]
